# Supplementary material
Source: HighWire-hosted journal article supplement (https://bmjopen.bmj.com/content/13/11/e069213)

2.1 If a problem arise that people cannot solve by themselves, our community as a whole will be able to solve it

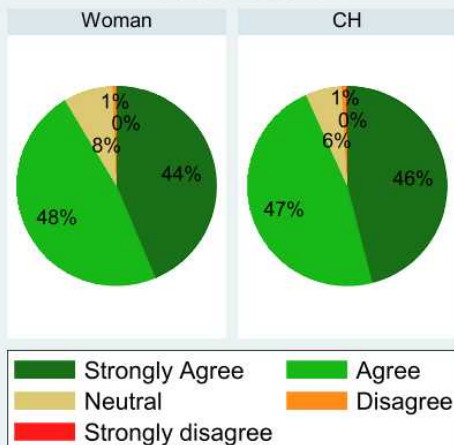

2.2 Whenever our community undertakes a project, we know that we will all work hard until it is accomplished

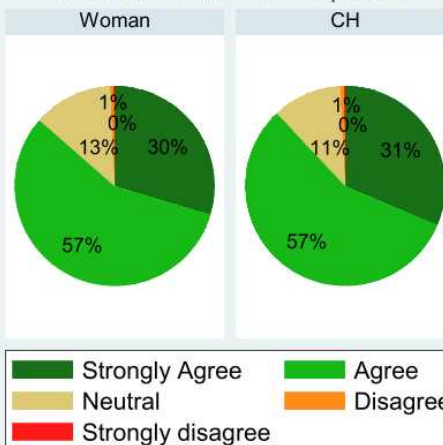

2.3 Whenever a community problem arises, I have a lot of confidence that we will be able to solve it

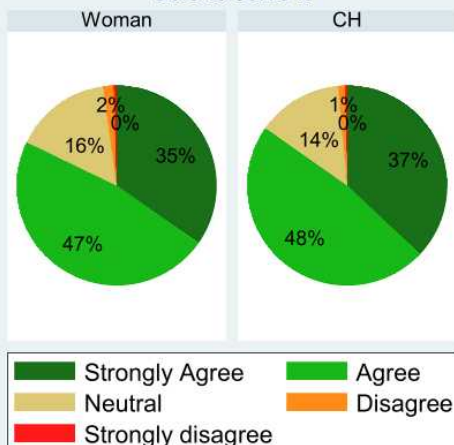

2.4 As members of this comm., we are able to tackle the most difficult situations because we are all committed to the same collective goals

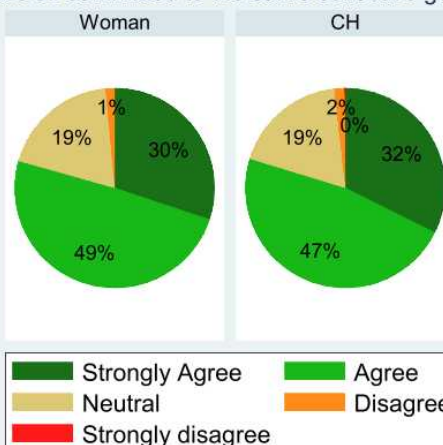

2.5 If people in this community work together, we can find solutions to many of our problems

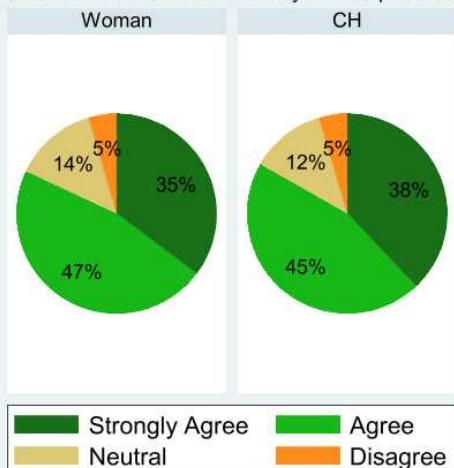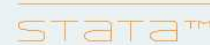

Supplement: inline-supplementary-material-3 [file inline-supplementary-material-3.pdf]
