# Supplementary material
Source: HighWire-hosted journal article supplement (https://bmjopen.bmj.com/content/13/11/e069213)
Supplement: inline-supplementary-material-4 [file inline-supplementary-material-4.pdf]

1.1 Most people in this community will help their neighbours when they have a problem

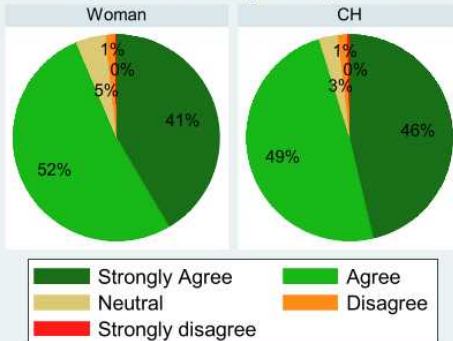

1.2 People in this community repay their debts to others

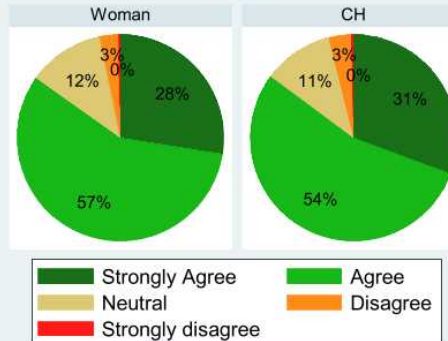

1.3 Disputes between households are very rare in this community

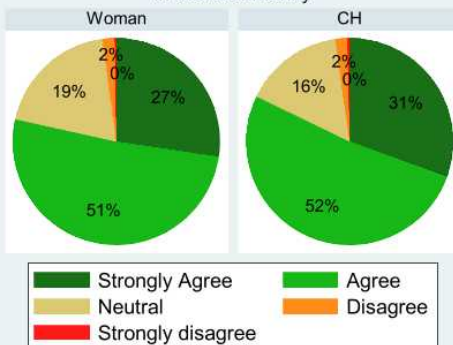

1.4 People in this community do not help each other in times of need

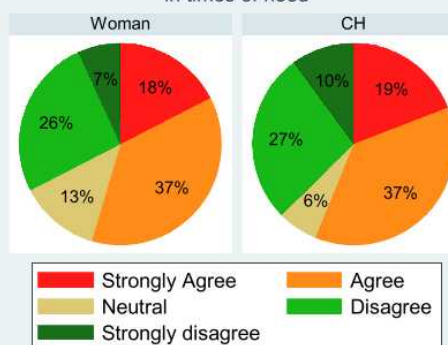

1.5 People in this community tend not to trust one another

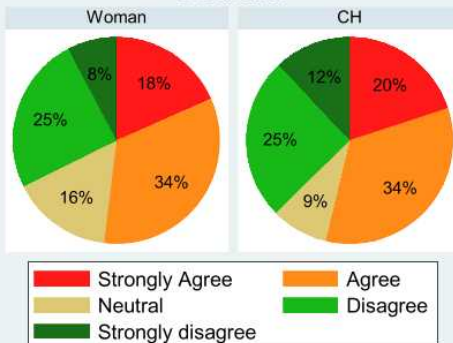

1.6 There are strong relationships between people in this community

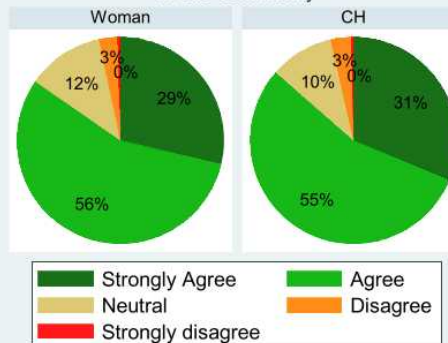

1.7 People in this community are always able to discuss problems that affect everyone

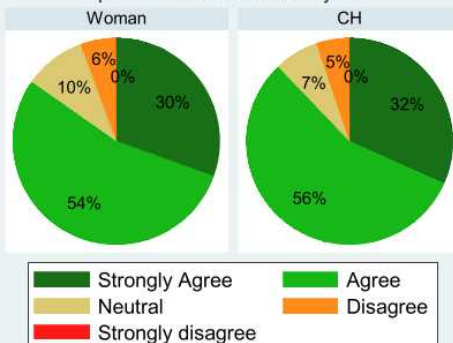

STATA™
